# Supplementary material for: Coordinated histone modifications are associated with gene expression variation within and between species
Source: HighWire-hosted journal article supplement (doi:10.1101/gr.116467.110), 2011-02-04
Supplement: Ha_chromatin_Suppfigures1.pdf [file Ha_chromatin_Suppfigures1.pdf]

10 Mbp

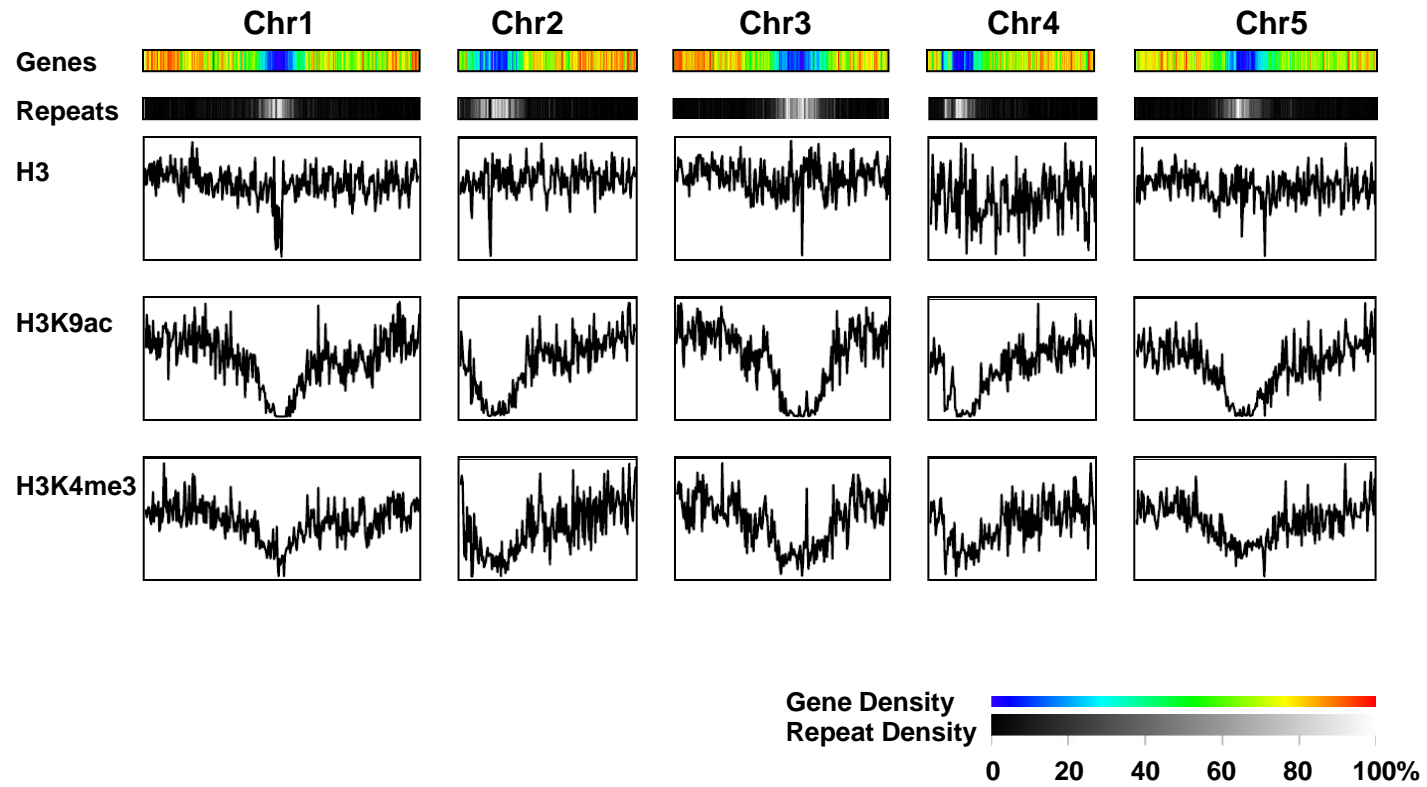

**Supplementary Figure 1. Genome-wide view of H3, H3K9Ac and H3K4me3 densities in 100kb window.** Y-axes are proportion of genomic region showing H3, H3K9Ac, H3K27me3 in 100kb window.

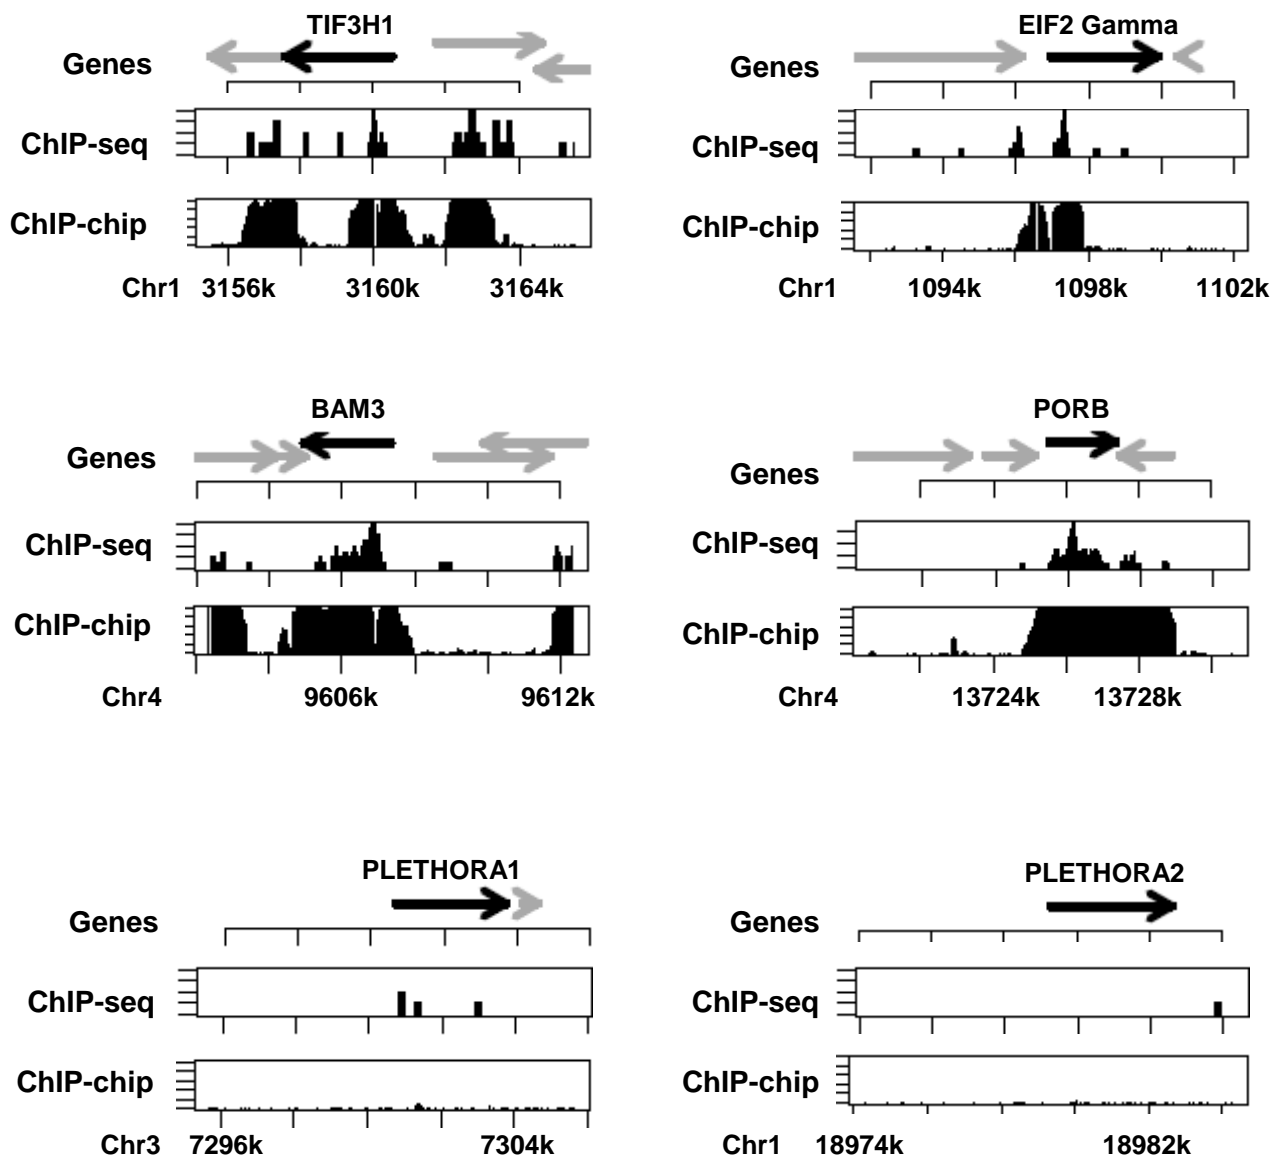

**Supplementary Figure 2. Comparison of H3K4me3 distributions from our ChIP-seq and ChIP-chip.** Using ChIP-seq, we could identify occupations of histone modification in high resolution. The results from ChIP-chip data may be different from that of ChIP-seq due to limitation of probe composition and cross-hybridization among homologous sequences in ChIP-chip. ChIP-chip data of H3K4me3 were obtained from Zhang et al.

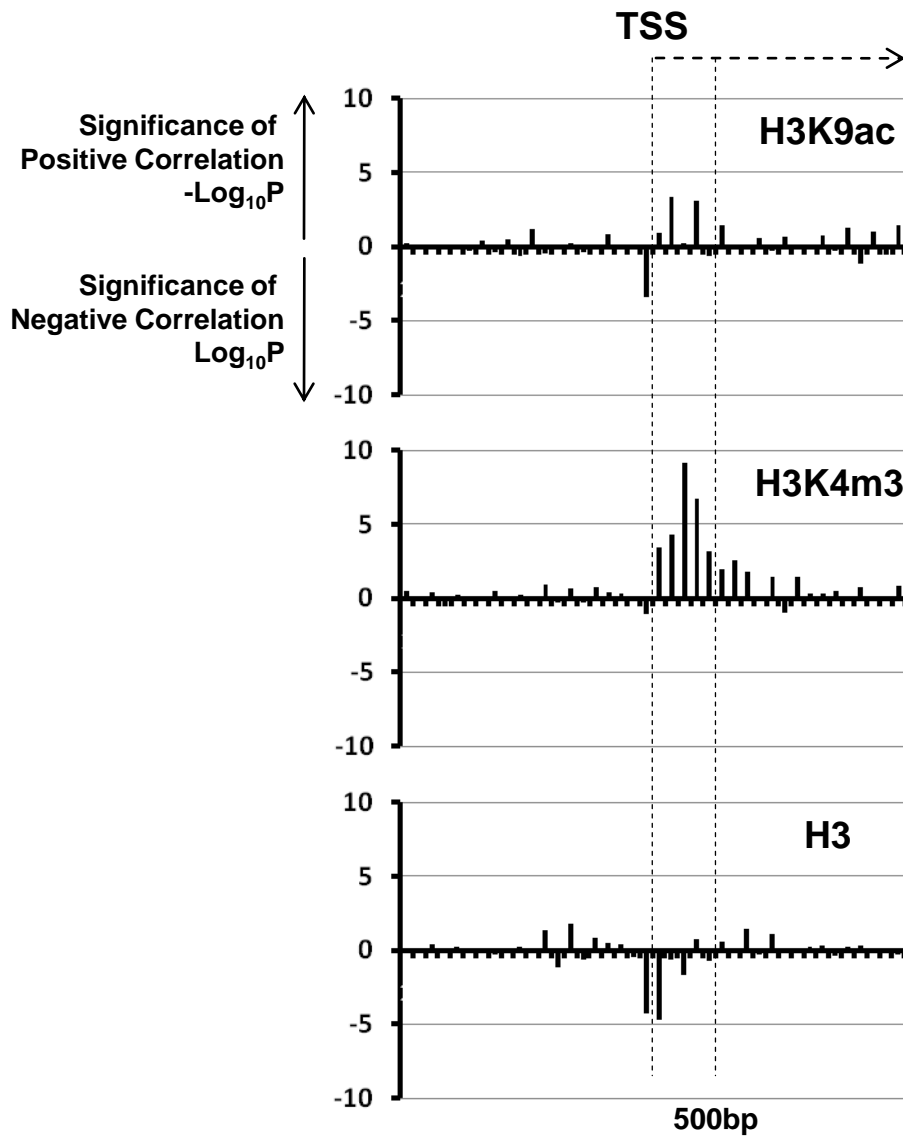

**Supplementary Figure 3. Multiple linear regression with transcription level and chromatin modifications at each position around TSS.**

## Translation Initiation Factors (Group1)

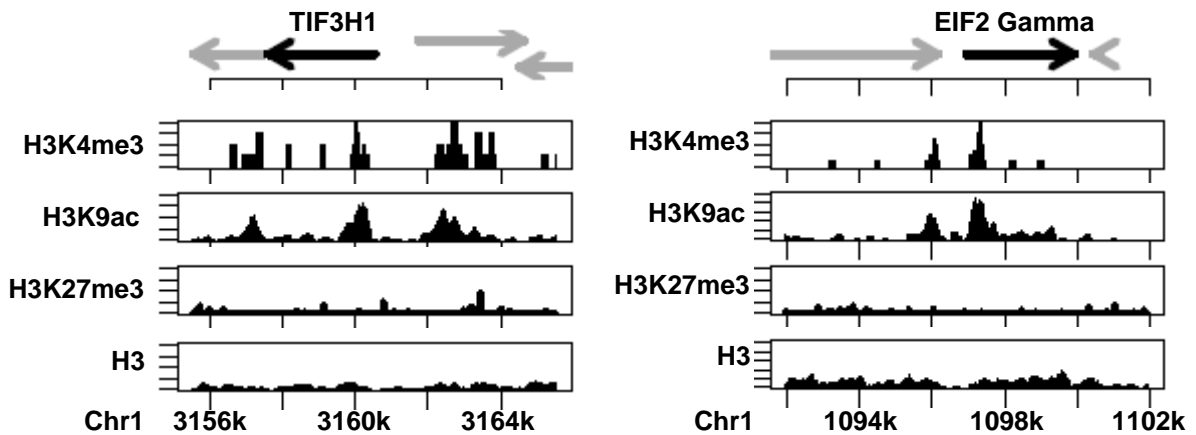

## Photosynthesis genes (Group 2)

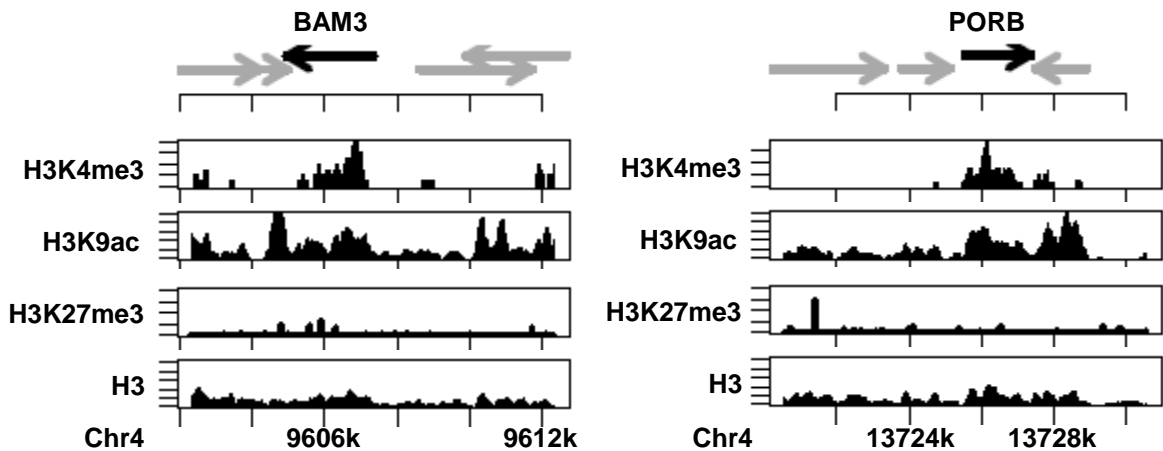

**Supplementary Figure 4. Detailed view of the genes in Group1 and Group2.** Normalized occupancy of H3K4me3, H3K9ac and H3 around TIF3H1 (AT1G10840, Translation Initiation Factor H1) and EIF2 gamma (AT1G04170, Eukaryotic Initiation Factor 2 gamma subunit). H3K27me3 is from ChIP-chip. BAM3(AT4G17090) encodes chloroplast beta-amylase. Inhibition of BAM3 by RNAi leads to failure of maltose accumulation during cold shock. PORB(AT4G27440, protochlorophyllide oxidoreductase B) encodes light-dependent NADPH and involved in chlorophyll biosynthesis and photosynthesis pathway.

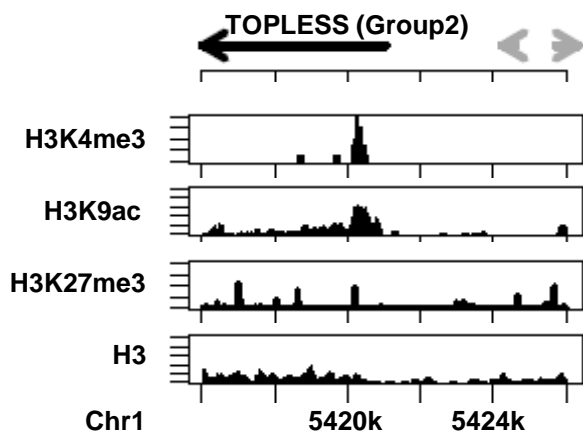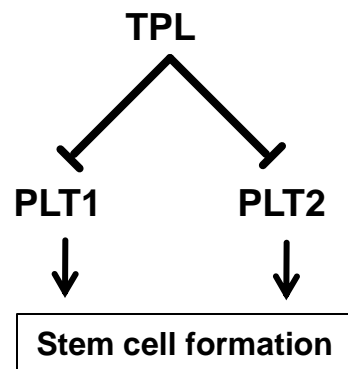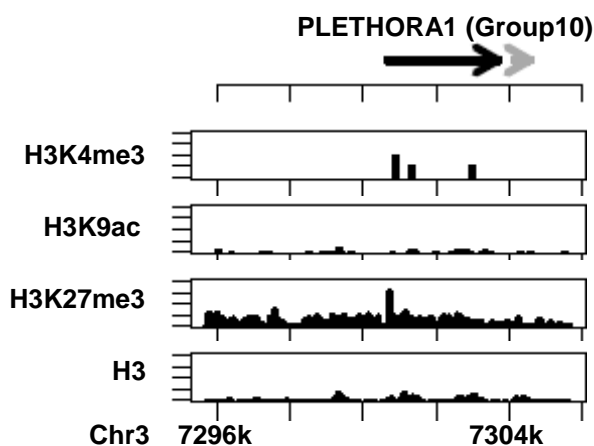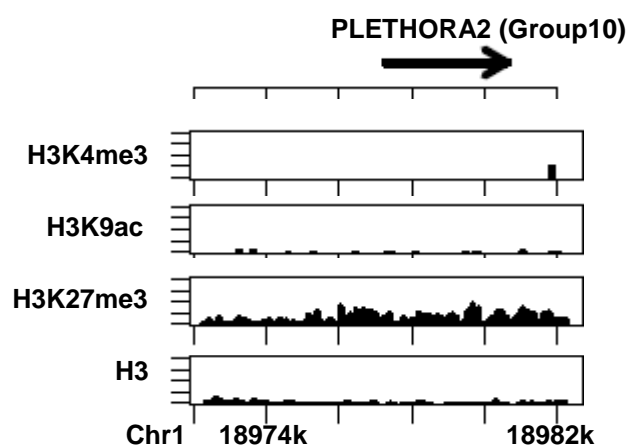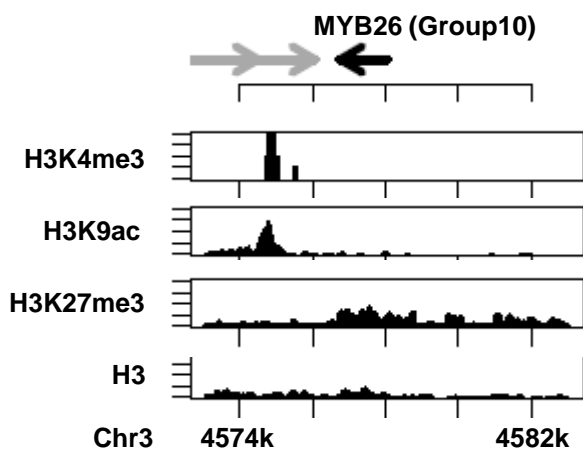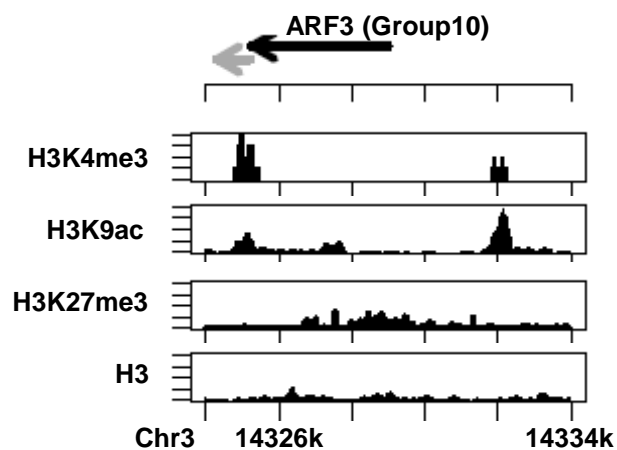

**Supplementary Figure 5. Detailed view of histone modifications around transcription factors involved in pattern specification.** PLT1 (AT3G20840, PLETHORA1) and PLT2 (AT1G51190, PLETHORA2) are essential genes for formation of stem cells. These genes show extensive H3K27m3 around and within genes. PLT1 and PLT2 are co-repressed by TPL (AT1G15750, TOPLESS). TPL show high level of H3K4m3 and H3K9Ac at the 5' end of gene.

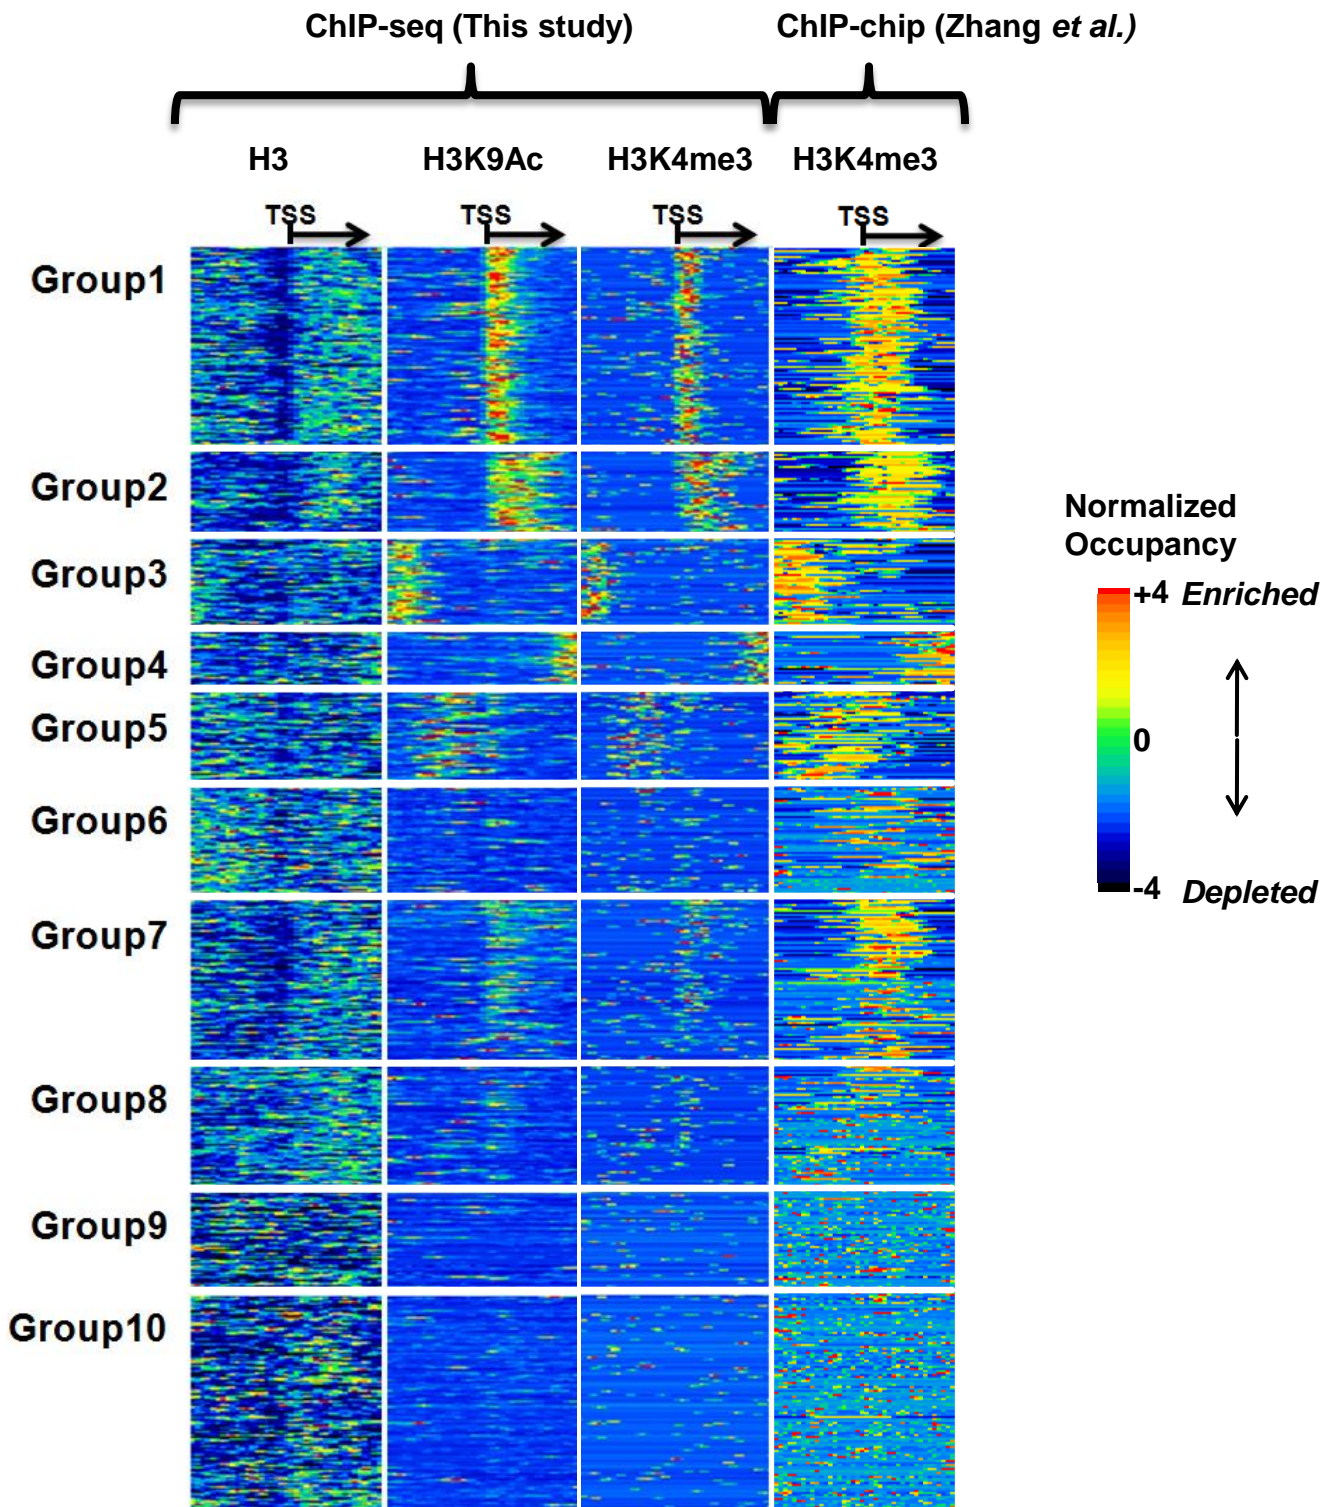

Supplementary Figure 6. Comparison of H3K4me3 distribution using two H3K4me3 genome-wide ChIP data sources. Individual rows stand for occupancy of histone modification. The signals from ChIP-chip data show wider distribution. That may be because ChIP-chip values are affected by probe composition and probe length.

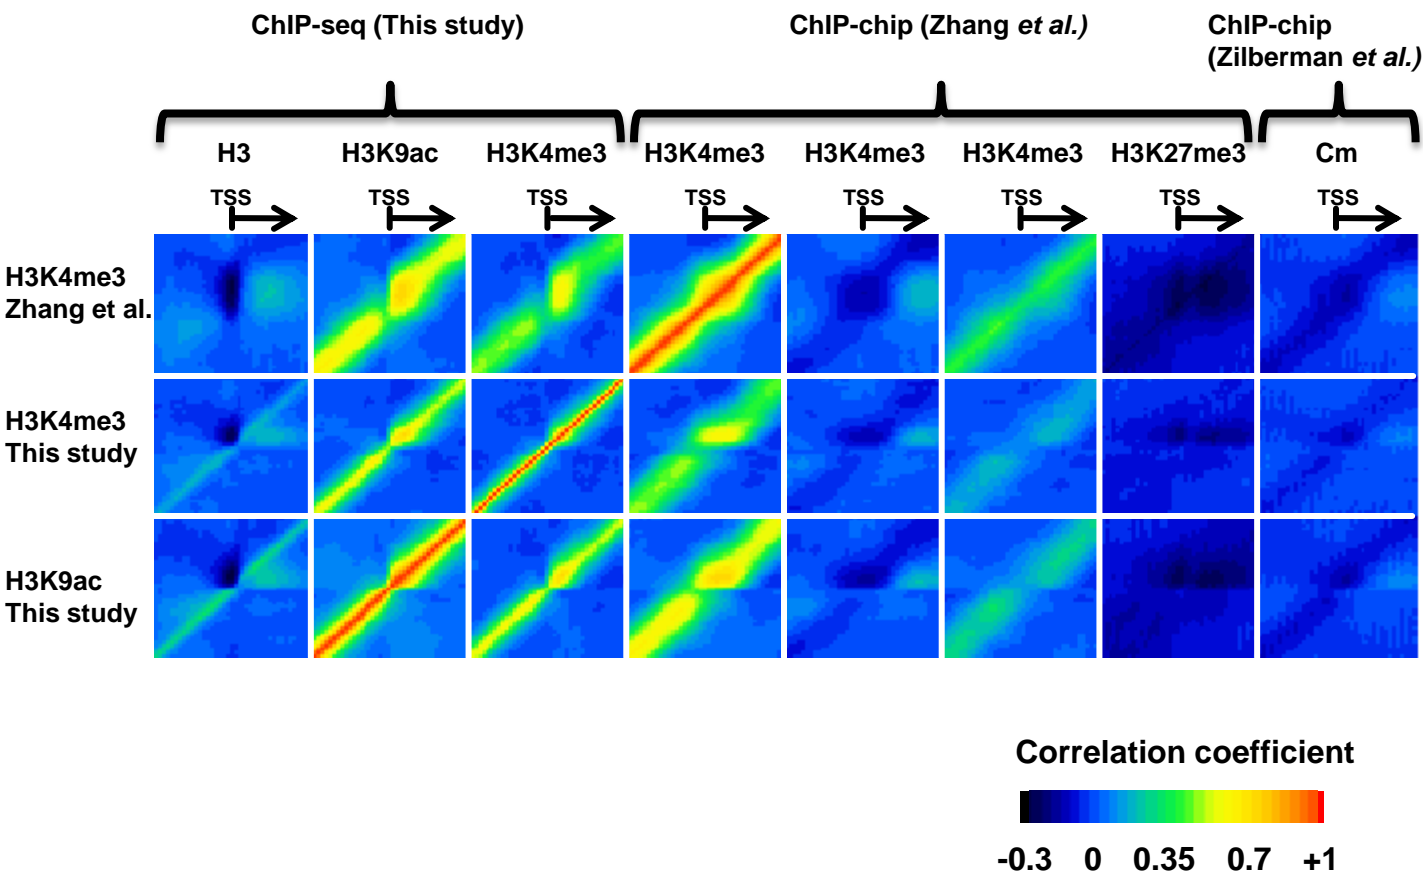

Supplementary Figure 7. Consistent relationships among histone modifications

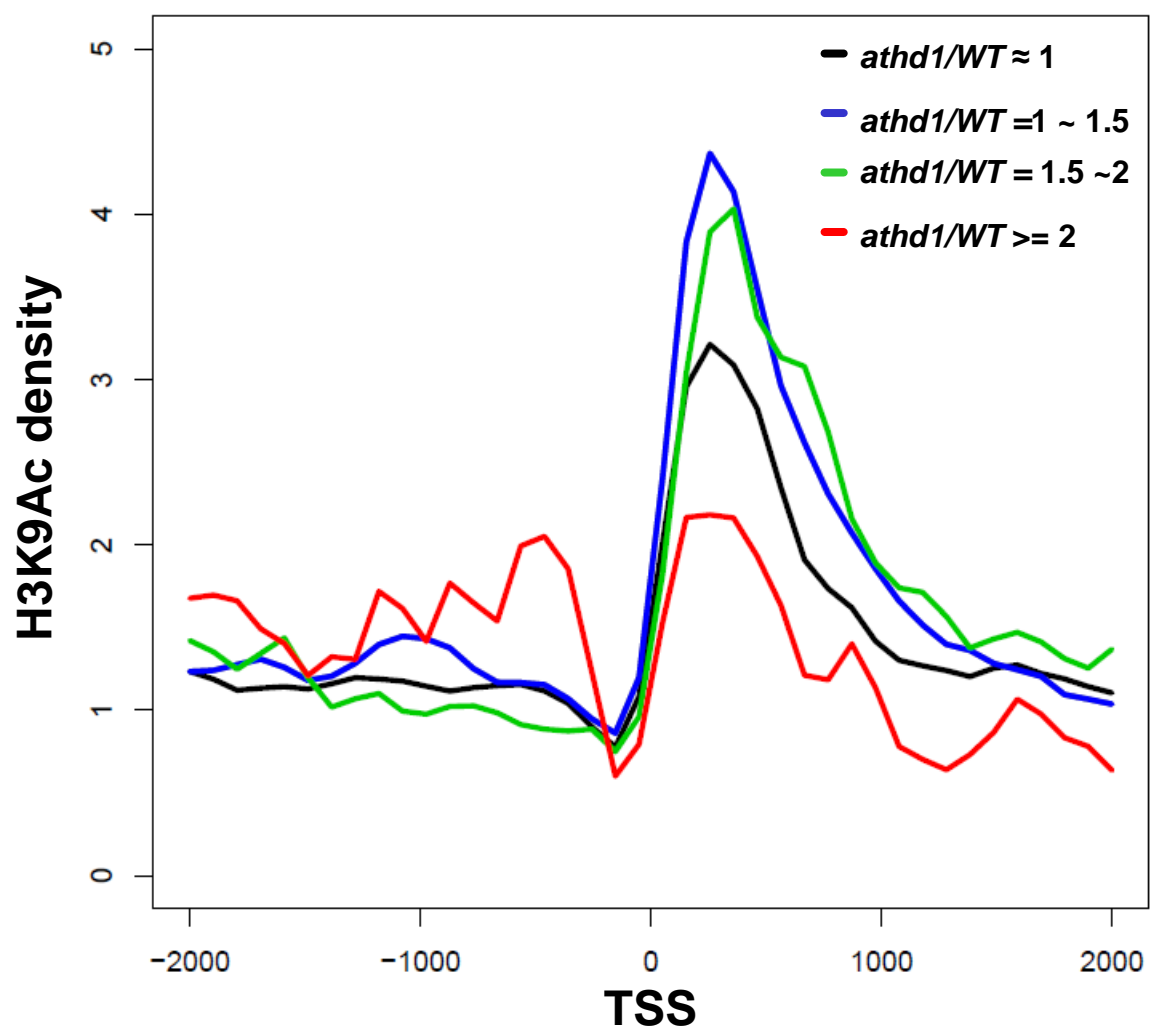

Supplementary Figure 8. H3K9Ac enrichment around gene sets up-regulated in AtHD1 mutants with fold changes  $\approx 1$ ,  $1 \sim 1.5$ ,  $1.5 \sim 2$  and greater than 2.
